# Supplementary material for: Comparison of the distance between the talus and lateral malleolus during the stance phase with and without chronic ankle instability
Source: PubMed Central journal article supplement — Sci Rep. 2024 Nov 7;14:27055. doi: 10.1038/s41598-024-78682-y (PMC11544139; doi:10.1038/s41598-024-78682-y), 2024-11-07
Supplement: 41598_2024_78682_MOESM1_ESM.pdf [file 41598_2024_78682_MOESM1_ESM.pdf]

## Supplementary data

To investigate the possibility that the attachment of the probe could ankle motion, the dorsiflexion and plantarflexion angles of the ankle during the stance phase of gait were compared with and without the probe. A paired t-test was used to compare the ankle angles during the stance phase with and without the probe. The results showed no significant differences between the two conditions (Supplementary Fig. 1).

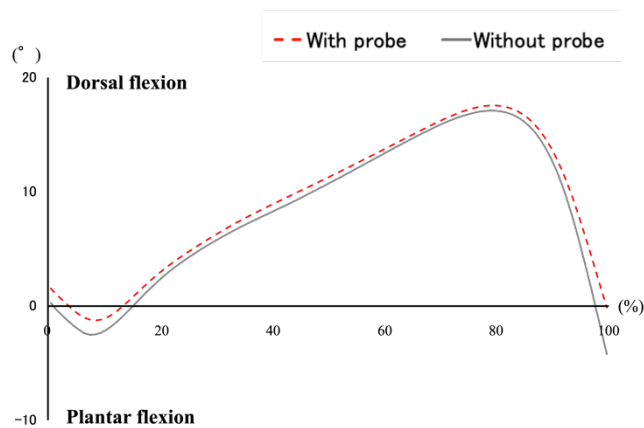

(a)

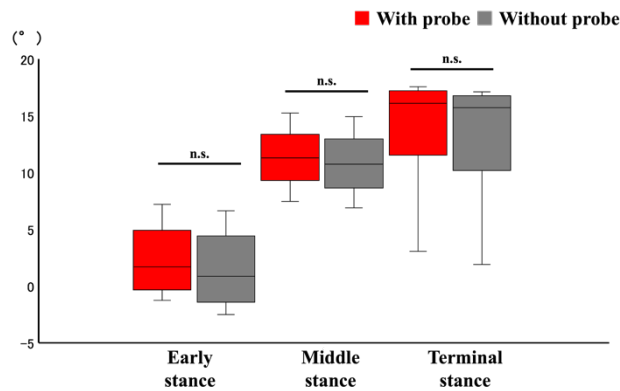

(b)

Supplemental Figure 1. The Ankle dorsiflexion/ plantar and angle during one stance phase of gait (a). Box plots compare ankle angles during the early, middle, and terminal stance phases (b). n.s.: not significant.
